# Supplementary material
Source: PubMed Central journal article supplement (PMC5786708)
Supplement: JCM.01624-17_zjm999095828s1.pdf [file JCM.01624-17_zjm999095828s1.pdf]

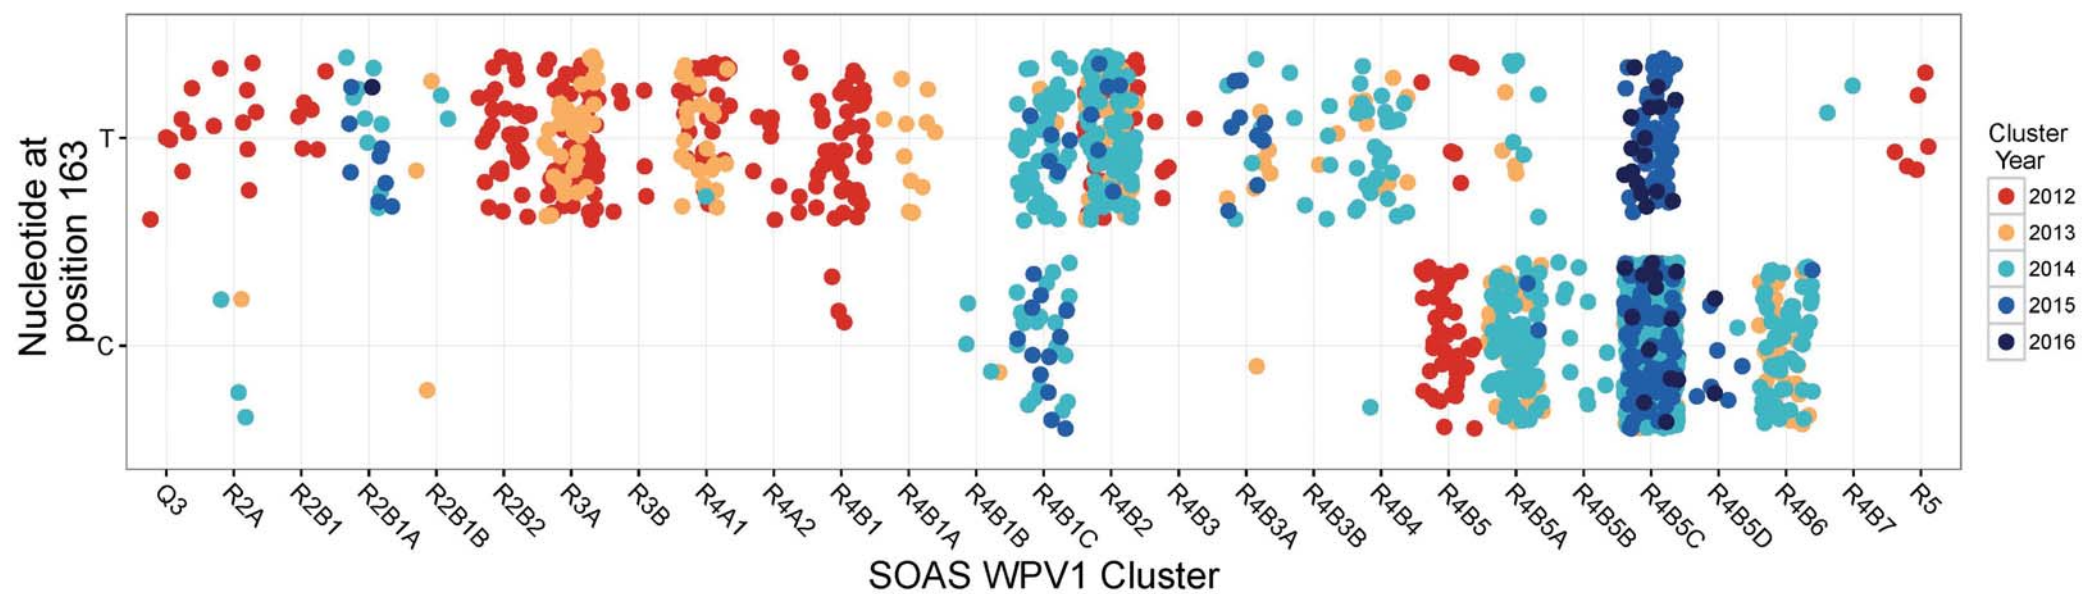

Figure S1. Genetic variation in nucleotide position 163 of the Viral Protein 1, VP1 region of South Asia wildtype poliovirus, WPV1 (no. of sequences = 1433), by year of emergence and by genetic cluster. Each colored dot indicates the year of collection (red = 2012, yellow = 2013, light blue = 2014, blue = 2015, navy = 2016).

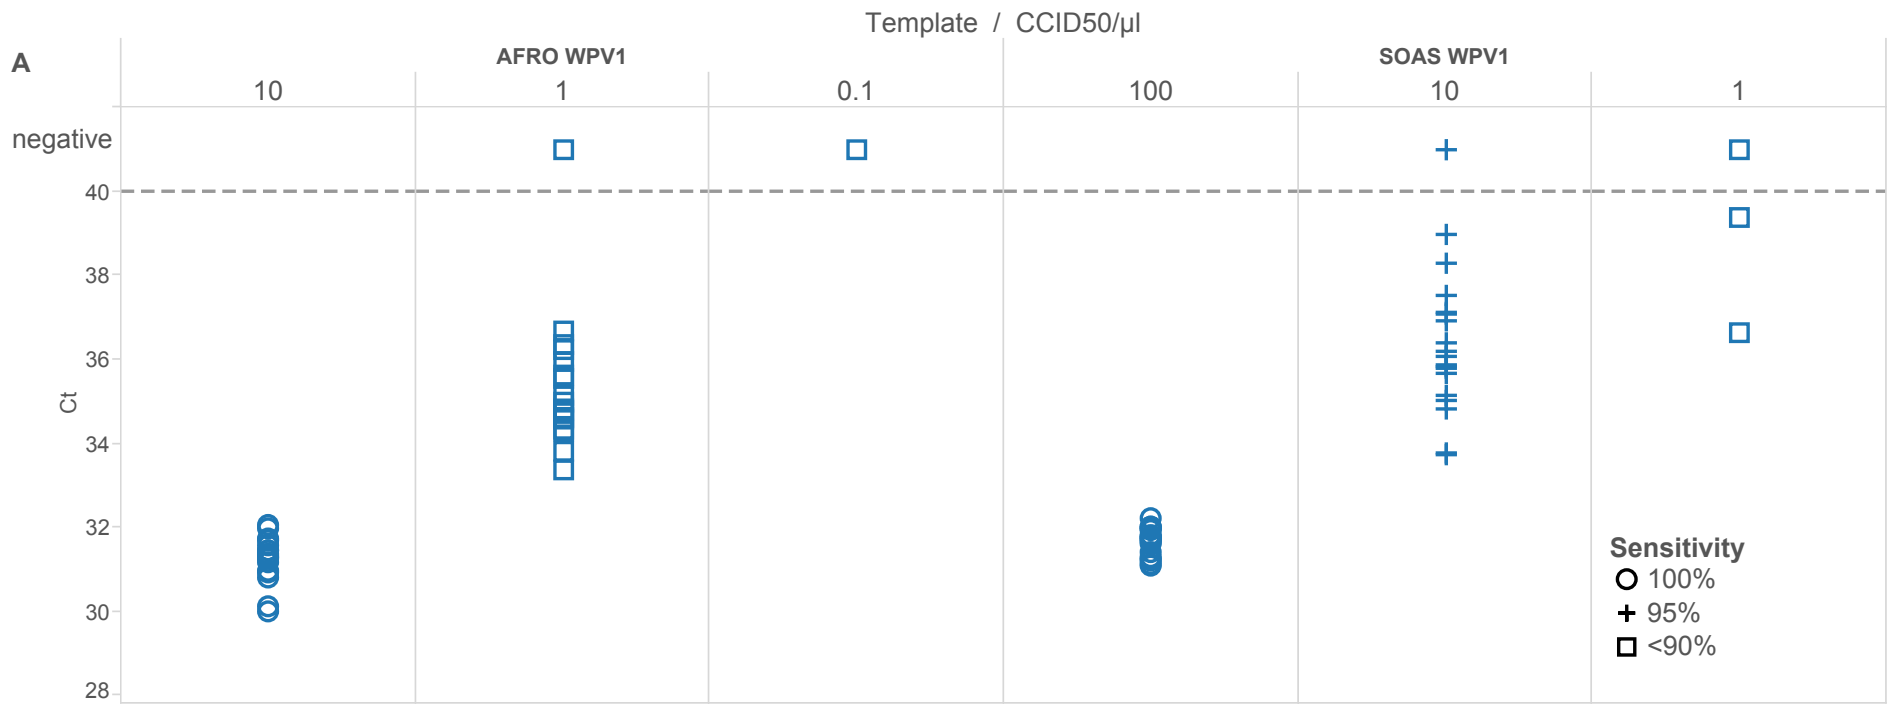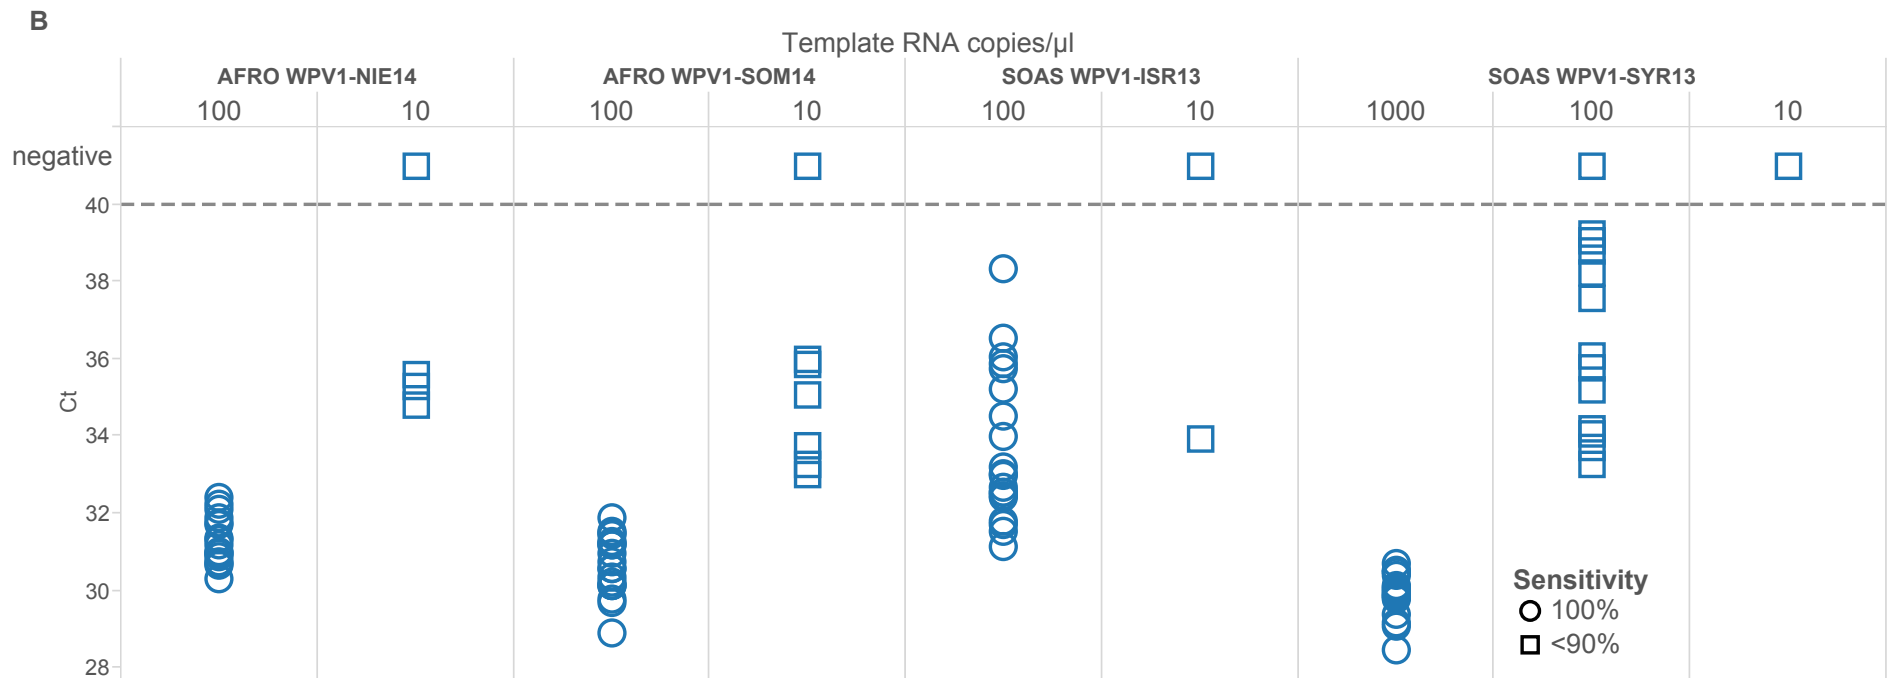

Figure S2 Sensitivity of the WPV1 assay. Dot plot diagram shows Ct values for different template concentrations, ordered by template, then by concentration (CCID50/ $\mu$ l) for virus isolates (A) and stepwise decrease in copy number of RNA transcripts (B). Negative samples (undetected by PCR) are shown above Ct 40 visually divided by a dotted line.

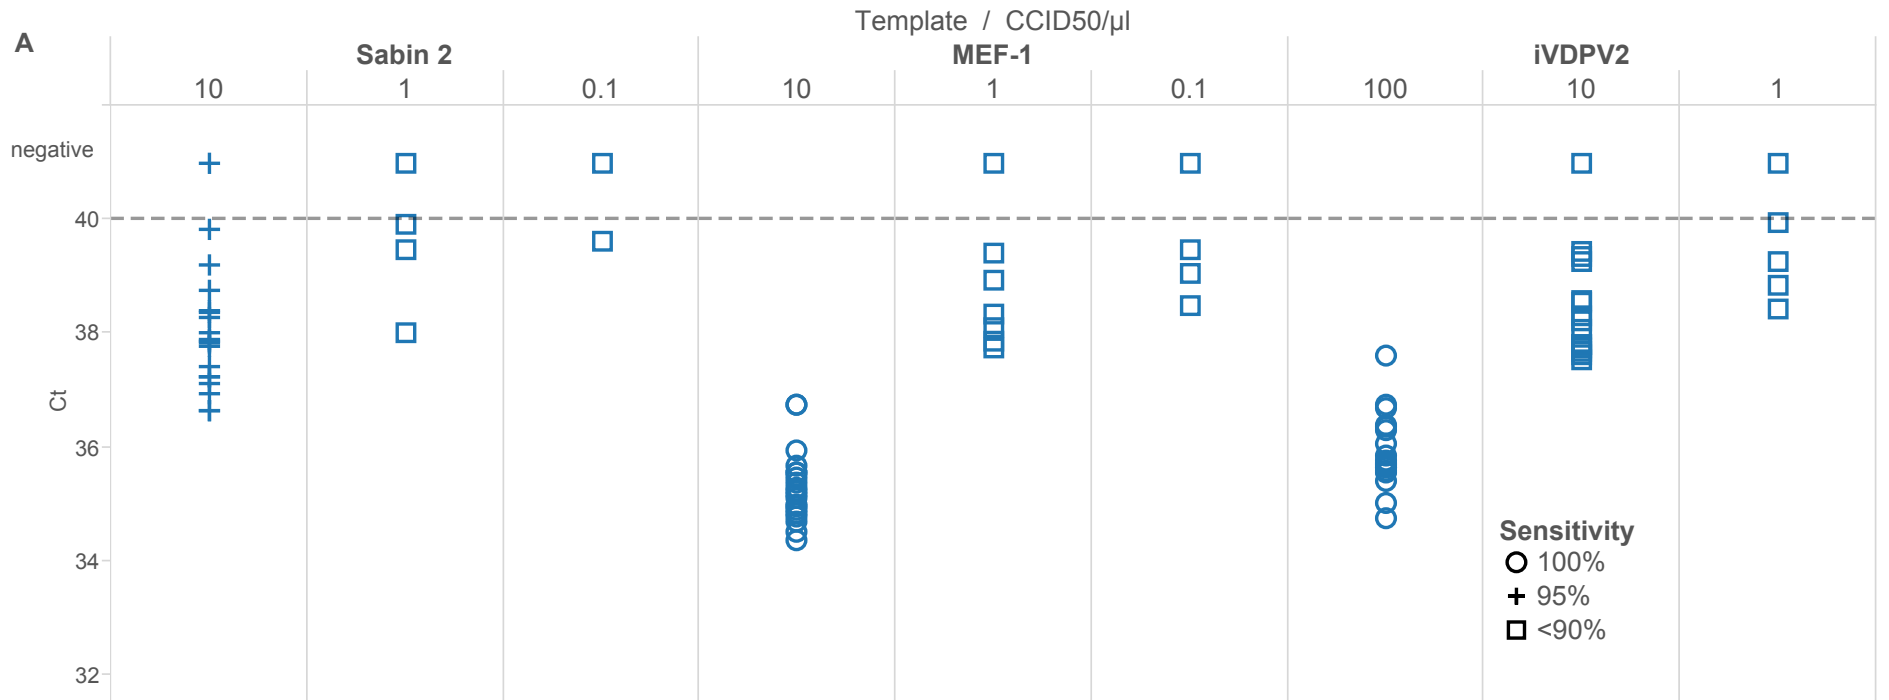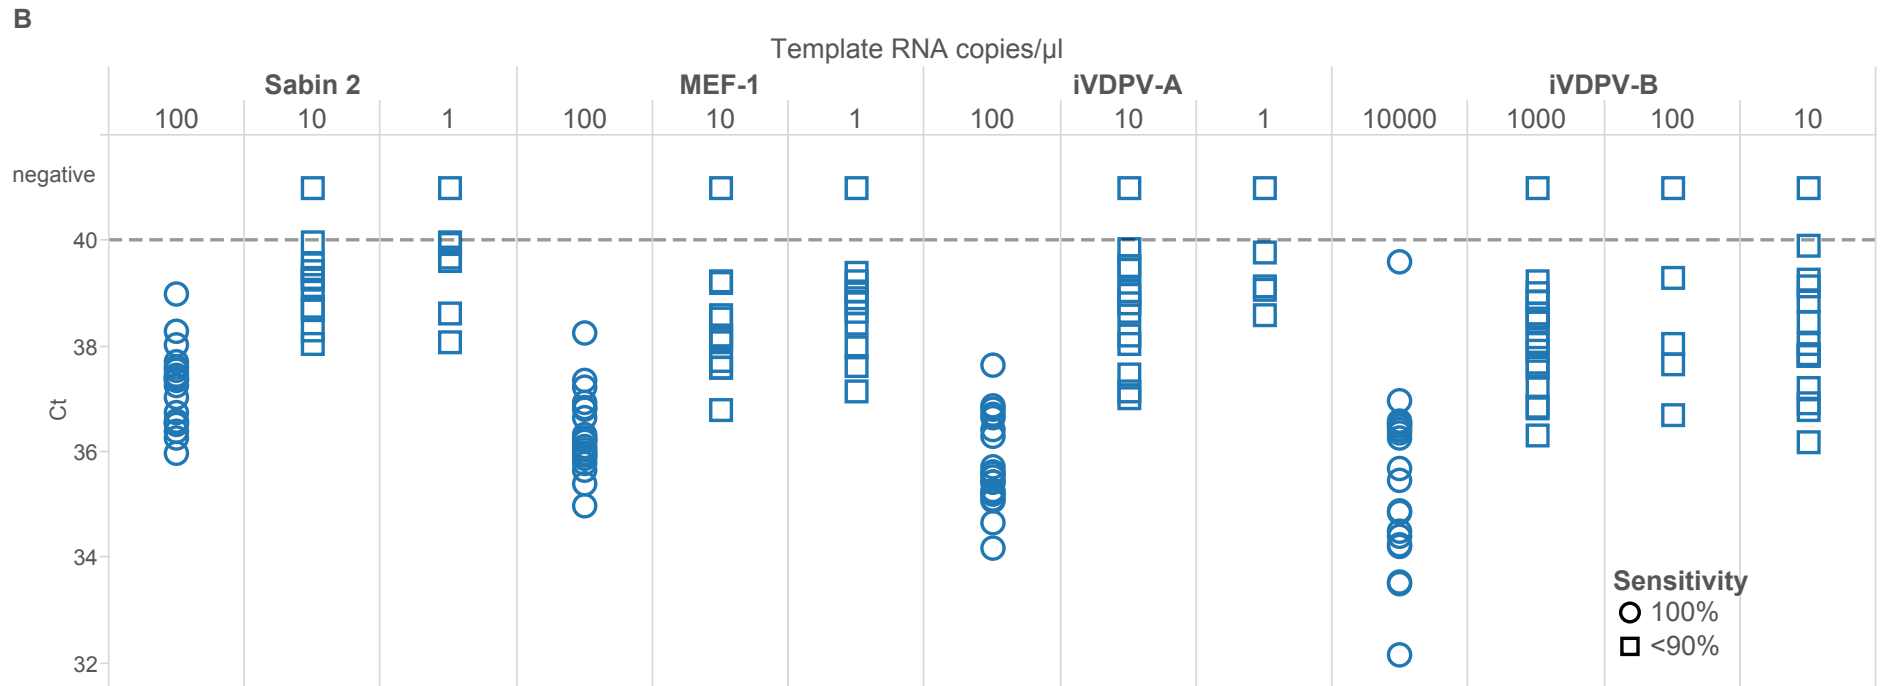

Figure S3. Sensitivity of the PV2 assay. Dot plot diagram shows Ct values for different template concentrations, ordered by template, then by concentration (CCID50/ $\mu$ l) for virus isolates (A) and stepwise decrease in copy number of RNA transcripts (B). Negative samples (undetected by PCR) are shown above Ct 40 visually divided by a dotted line.

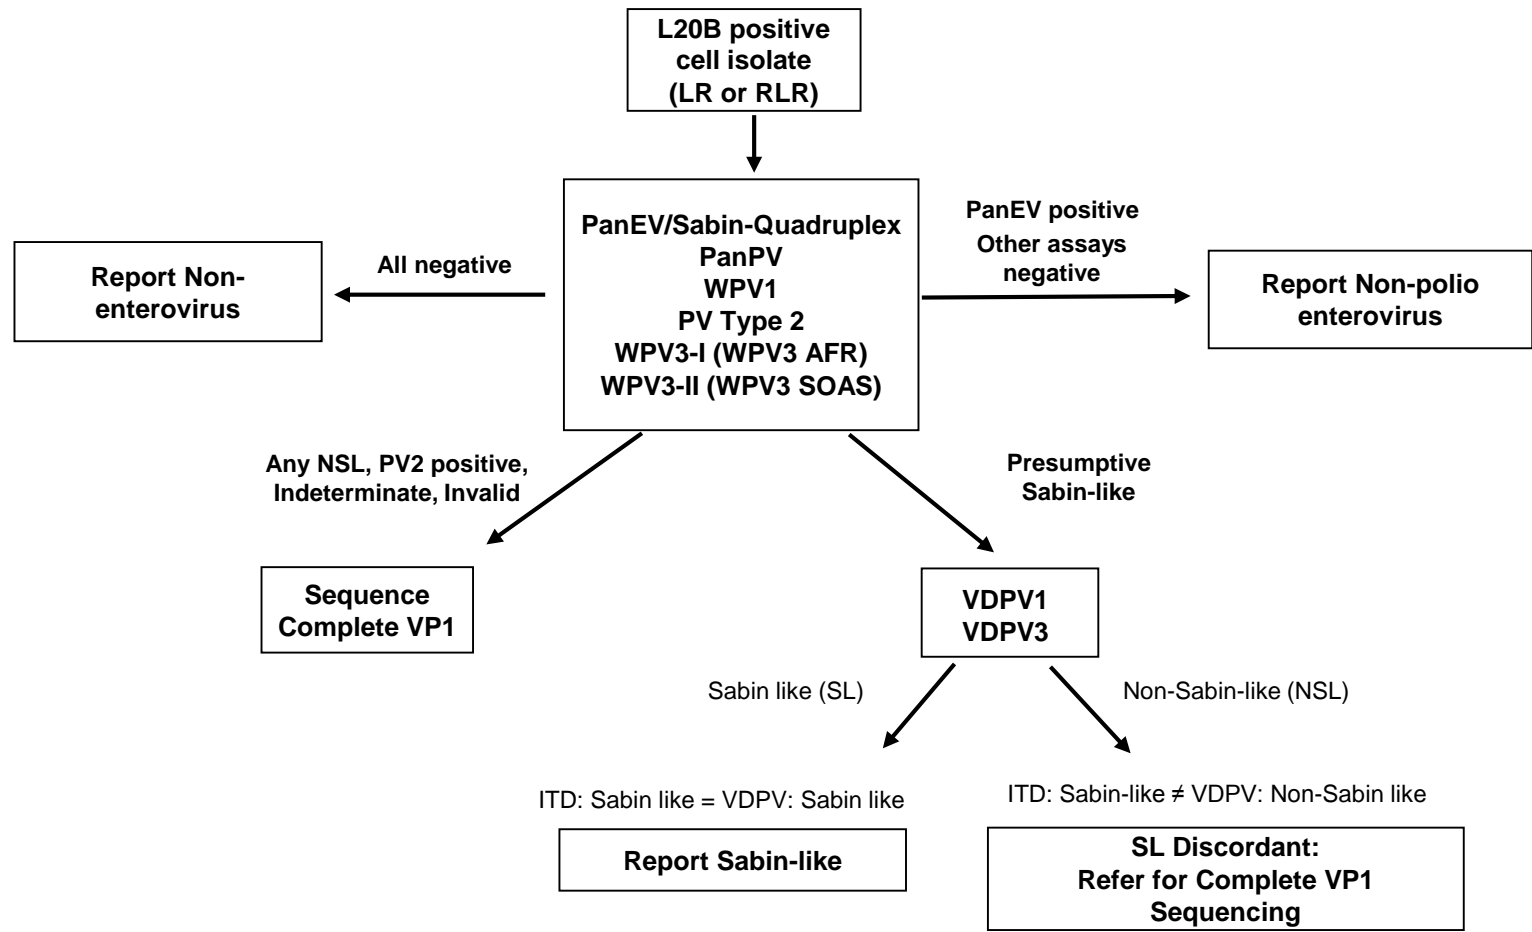

**Figure S4** Flowchart of the ITD 5.0 algorithm for testing virus isolates with the rRT-PCR assay

**Table S1.** Statistical probability of positivity in each rRT-PCR assay by target, template and concentration of virus (titer is CCID<sub>50</sub>μl<sup>-1</sup>).

| Target Assay              | Template  | 1000                     | 100 CCID <sub>50</sub> μl <sup>-1</sup> | 10 CCID <sub>50</sub> μl <sup>-1</sup> | 1 CCID <sub>50</sub> μl <sup>-1</sup> | 0.1 CCID <sub>50</sub> μl <sup>-1</sup> | 0.01 CCID <sub>50</sub> μl <sup>-1</sup> |
|---------------------------|-----------|--------------------------|-----------------------------------------|----------------------------------------|---------------------------------------|-----------------------------------------|------------------------------------------|
| <b>Quadruplex EV</b>      | Sabin 1   | NA                       | NA                                      | p < .001**<br>(100%, 83-100%)          | p = .12 (70%, 46-88%)                 | p < .001†                               | NA                                       |
|                           | Sabin 2   | NA                       | NA                                      | p < .001**<br>(100%, 83-100%)          | p = .12 (70%, 46-88%)                 | p < .001†                               | NA                                       |
|                           | Sabin 3   | NA                       | NA                                      | NA                                     | p < .001** (100%, 83-100%)            | p > .82 (45%, 23-68%)                   | p < .001† (5%,                           |
|                           | AFRO WPV1 | NA                       | p < .001**<br>(100%, 83-100%)           | p < .001**<br>(95%, 83-100%)           | p = .041 (25%, 9-49%)                 | NA                                      | NA                                       |
|                           | SOAS WPV1 | NA                       | p < .001**<br>(100%, 83-100%)           | p = .012 (80%, 56-94%)                 | p = .003 (15%, 3-38%)                 | NA                                      | NA                                       |
| <b>Quadruplex-Sabin 1</b> | Sabin 1   | NA                       | NA                                      | NA                                     | p < .001** (100%, 83-100%)            | p = .5 (40%, 19%-64%)                   | p < .001† (10%, 0.1-                     |
| <b>Quadruplex-Sabin 2</b> | Sabin 2   | NA                       | NA                                      | NA                                     | p < .001** (95%, 83-100%)             | p < .001† (5%, 0.1%-                    | p < .001† (5%,                           |
| <b>Quadruplex-Sabin 3</b> | Sabin 3   | NA                       | NA                                      | NA                                     | p < .001** (100%, 83-100%)            | p = .044 (75%, 51-91%)                  | p = .003 (15%, 3-                        |
| <b>PanPV</b>              | Sabin 1   | NA                       | p < .001**<br>(100%, 83-100%)           | p < .001**<br>(100%, 83-100%)          | p = .5 (40%, 19-64%)                  | NA                                      | NA                                       |
|                           | Sabin 2   | NA                       | NA                                      | NA                                     | p < .001** (100%, 83-100%)            | p > .82 (45%, 23-68%)                   | p < .001                                 |
|                           | Sabin 3   | NA                       | NA                                      | p < .001**<br>(100%, 83-100%)          | p < .001** (100%, 83-100%)            | p = 1 (50%, 27-                         | NA                                       |
|                           | AFRO WPV1 | NA                       | p < .001**<br>(100%, 83-100%)           | p = .12 (30%, 12-54%)                  | p < .001† (0-17%)                     | NA                                      | NA                                       |
|                           | SOAS WPV1 | p < .001**<br>(100%, 83- | p < .001**<br>(100%, 83-100%)           | p = .26 (35%, 15-60%)                  | NA                                    | NA                                      | NA                                       |
| <b>PV2</b>                | Sabin 2   | NA                       | NA                                      | p < .001**<br>(95%, 83-100%)           | p = .003 (15%, 3-38%)                 | p < .001† (5%, 0.1-                     | NA                                       |
|                           | iVDPV2    | NA                       | p < .001**<br>(100%, 83-100%)           | p = .12 (70%, 46-88%)                  | p = .012 (20%, 6-44%)                 | NA                                      | NA                                       |
|                           | MEF-1     | NA                       | NA                                      | p < .001**<br>(100%, 83-100%)          | p = .12 (30%, 12-54%)                 | p = .003 (15%, 3-38%)                   | NA                                       |
| <b>WPV1</b>               | AFRO WPV1 | NA                       | NA                                      | p < .001**<br>(100%, 83-100%)          | p = .003 (85%, 62-96%)                | p < .001†                               | NA                                       |
|                           | SOAS WPV1 | NA                       | p < .001**<br>(100%, 83-100%)           | p < .001**<br>(95%, 83-100%)           | p < .001† (10%, 0.1-32%)              | NA                                      | NA                                       |
| <b>WPV3 AFR</b>           | AFRO WPV3 | NA                       | NA                                      | p < .001**<br>(100%, 83-100%)          | p < .001** (95%, 83-100%)             | p > .82 (45%, 23-68%)                   | NA                                       |
| <b>WPV3 SOAS</b>          | SOAS WPV3 | NA                       | p < .001**<br>(100%, 83-100%)           | p < .001**<br>(100%, 83-100%)          | p = .041 (25%, 9-49%)                 | NA                                      | NA                                       |

\*Probability of sample residing within the 95% Confidence Interval

\*\*Significantly greater than 99% probability for positivity

†Significantly less than 99% probability for positivity

**Table S2.** Statistical probability of positivity for each rRT-PCR assay by target, template and concentration of RNA transcripts.

| Target Assay              | Template (copy number/ $\mu$ l) | 1000 RNA copies<br>99% p value | 100 RNA copies<br>99% p value | 10 RNA copies<br>99% p value  | 1 RNA copy<br>99% p value   | 0.1 RNA copy<br>99% p value |
|---------------------------|---------------------------------|--------------------------------|-------------------------------|-------------------------------|-----------------------------|-----------------------------|
| <b>Quadruplex EV</b>      | SOAS WPV3 + EV                  | NA                             | NA                            | p < .001**<br>(100%, 83-100%) | p < .001**<br>(75%, 51-91%) | p < .001†<br>(5%, 0.1-25%)  |
| <b>Quadruplex-Sabin 1</b> | Sabin 1                         | NA                             | NA                            | p < .001**<br>(100%, 83-100%) | p=1<br>(50%, 27-73%)        | p < .001†<br>(10%, 0.1-32%) |
| <b>Quadruplex-Sabin 2</b> | Sabin 2                         | NA                             | NA                            | p < .001**<br>(100%, 83-100%) | p= .012 (20%, 6-44%)        | p < .001†<br>(0-17%)        |
| <b>Quadruplex-Sabin 3</b> | Sabin 3                         | NA                             | NA                            | p < .001**<br>(100%, 83-100%) | p= .5 (40%, 19-64%)         | p < .001†<br>(5%, 0.1-25%)  |
| <b>PanPV</b>              | Sabin 1                         | p < .001**<br>(100%, 83-100%)  | p= .26 (35%, 15-60%)          | p < .001†<br>(0-17%)          | NA                          | NA                          |
|                           | Sabin 3                         | NA                             | p < .001**<br>(100%, 83-100%) | p > .5 (55%, 32-77%)          | p < .001†<br>(0-17%)        | NA                          |
|                           | AFRO WPV1-SOM14                 | NA                             | p < .001**<br>(100%, 83-100%) | p= .012 (20%, 6-44%)          | p < .001†<br>(0-17%)        | NA                          |
| <b>PV2</b>                | PV2-VDPV2-NIE                   | NA                             | p < .001**<br>(100%, 83-100%) | p > .5 (55%, 32-77%)          | p= .041 (25%, 9-49%)        | NA                          |
|                           | PV2-MEF-1                       | NA                             | p < .001**<br>(100%, 83-100%) | p= .26 (65%, 41-85%)          | p=1<br>(5%, 27-73%)         | NA                          |
|                           | iVDPV-A                         | NA                             | p < .001**<br>(100%, 83-100%) | p > .5<br>(60%, 36-81%)       | p= .012 (20%, 6-44%)        | NA                          |
|                           | iVDPV-B <sup>^</sup>            | p= .012 (80%, 56-94%)          | p= .012 (20%, 6-44%)          | p= .26 (65%, 41-85%)          | NA                          | NA                          |
| <b>WPV1</b>               | AFRO WPV1-SOM14                 | NA                             | p < .001**<br>(100%, 83-100%) | p= .12 (30%, 12-54%)          | p < .001†<br>(0-17%)        | NA                          |
|                           | AFRO WPV1-NIE14                 | NA                             | p < .001**<br>(100%, 83-100%) | p=0.003<br>(15%, 3-38%)       | p < .001†<br>(0-17%)        | NA                          |
|                           | SOAS WPV1-SYR13                 | p < .001**<br>(100%, 83-100%)  | p= .26 (65%, 41-85%)          | p < .001†<br>(0-17%)          | NA                          | NA                          |
|                           | SOAS WPV1-ISR13                 | NA                             | p < .001**<br>(100%, 83-100%) | p < .001†<br>(5%, 0.1-25%)    | p < .001†<br>(0-17%)        | NA                          |
| <b>WPV3 AFR</b>           | AFRO WPV3-NIE12                 | NA                             | NA                            | p < .001**<br>(100%, 83-100%) | p= .12 (70%, 46-88%)        | p= .012 (20%, 6-44%)        |
|                           | AFRO WPV3-NIE12_2               | NA                             | p < .001**<br>(100%, 83-100%) | p= .12 (30%, 12-54%)          | p < .001†<br>(5%, 0.1-25%)  | NA                          |
| <b>WPV3 SOAS</b>          | SOAS WPV3-PAK1                  | NA                             | p < .001**<br>(100%, 83-100%) | p= .26 (35%, 15-60%)          | p < .001†<br>(0-17%)        | NA                          |
|                           | SOAS WPV3-PAK2                  | NA                             | p < .001**<br>(100%, 83-100%) | p > .5 (55%, 32-77%)          | p < .001†<br>(5%, 0.1-25%)  | NA                          |

\*Probability of sample residing within the 95% Confidence Interval (CI)

\*\*Significantly greater than 99% probability

†Significantly less than 99% probability

<sup>^</sup>iVDPV (iVDPV-B: most diverse from Sabin 2 VP1 sequence) tested with 10,000 copies/ $\mu$ l with p < 0.001 (100%, 83-100%).

**Table S3.** Sequences of primers and components used for RNA transcript library.

| Sequence name                    | Name              | Position in transcript (bp) | Sequence (5' to 3')                                |
|----------------------------------|-------------------|-----------------------------|----------------------------------------------------|
| T7 promotor                      |                   | 1-20                        | TAATACGACTCACTATAGGG                               |
| 2A PVA                           | Primer            | 1353 -1378                  | ATGGARGCHAAAYRAHTAYTAYCCRGC                        |
| 5' UTR                           | (Sabin 1-like)    | 1379-1541                   | TCCTCCGGCCCCTGAATGCGGCTAATCCCAACCACGGAGCAGG<br>T   |
|                                  |                   |                             | AGTAATGTGATTGTTAGTGACCTGTCGTAACGCGCAAGTCCGT<br>G   |
|                                  |                   |                             | GCGGAACCGACTACTTTGGGTGTCCGTGTTTCCTTTTATCTTT<br>ATT |
|                                  |                   |                             | CTGGCTGCTTATGGTGACAATCGCAGATT                      |
| <i>Mlu</i> 1 and<br><i>Not</i> 1 | Restriction sites | 1542-1555                   | ACGCGTGCGGCCGC                                     |

**Table S4** Primers and primer sequences used for whole-genome amplification of polioviruses serotypes 1, 2 and 3

| Primer name | Concentration used | Target Gene | Orientati on | Reference virus  | Start | End  | Sequence                   | Target virus |
|-------------|--------------------|-------------|--------------|------------------|-------|------|----------------------------|--------------|
| PPV/PCR-1A  | 80uM               | VP1         | A            | Sabin 1 AY184219 | 2956  | 2933 | AYRTACATIATYTGRTAIAC       | Pan Polio    |
| EV/PCR-2    | 80uM               | 5 UTR       | S            | Sabin 1 AY184219 | 446   | 470  | TCCGGCCCTGAATGCGGCTAATCC   | Pan EV       |
| EV/PCR-1    | 10uM               | 5 UTR       | A            | Sabin 1 AY184219 | 559   | 533  | ACACGGACACCCAAAGTAGTCGGTTC | Pan EV       |
| PV2S        | 80uM               | VP1         | S            | Sabin 1 AY184219 | 2856  | 2875 | CITAITCIMGITTYGAYATG       | Pan Polio    |
| 239S        | 80uM               | 2A          | S            | Sabin 1 AY184219 | 3389  | 3408 | TTPGGICAPCARAAYAARGC       | Pan Polio    |
| 153A        | 40uM               | 2B          | A            | Sabin 1 AY184219 | 3839  | 3821 | TIAYICCTIGYTCCATNGC        | Pan Polio    |
| 4934S       | 40uM               | 2C          | S            | Sabin 1 AY184219 | 4926  | 4950 | TGTGYAARAAGTGYCAYCAACCAGC  | Species C    |
| 4474S       | 10uM               | CRE         | S            | Sabin 1 AY184219 | 4463  | 4485 | TTCAAGACAAACACCGTATTGA     | Species C    |
| 4474A       | 10uM               | CRE         | A            | Sabin 1 AY184219 | 4485  | 4463 | TCAATACGGTGTGCTCTTGAA      | Species C    |
| 5107A       | 40uM               | 2C-3A       | A            | Sabin 1 AY184219 | 5112  | 5093 | CCYTGRAAIAGIGCYTCCAT       | Species C    |
| 7450A       | 40uM               | UTR-polyA   | A            | Sabin 2 AY184220 | 7446  | 7425 | TTTTTTCYCCGAATYAAAGAA      | Species C    |
| S2-1197A    | 10uM               | VP2         | A            | Sabin 2 AY184220 | 1197  | 1179 | TTTCCACCACCACCCTCTG        | Sabin 2      |
| 188S        | 40uM               | 2A          | S            | Sabin 1 AY184219 | 3698  | 3717 | TCICCGIGIGAdPTGdPGNGG      | Pan Polio    |
| 5761A       | 20uM               | 3C          | A            | Sabin 1 AY184219 | 5766  | 5747 | GGGTACTTRCTAGTGTTCAC       | Species C    |
| 5918S       | 20uM               | 3C          | S            | Sabin 1 AY184219 | 5912  | 5937 | GGGATGCATGTYGGIGGAACGGTTC  | Species C    |
| 6007A       | 60uM               | 3C-3D       | A            | Sabin 1 AY184219 | 6005  | 5984 | TCATCCAYTGRATYTCACCTTG     | Species C    |
| 237A        | 3uM                | 3D          | A            | Sabin 1 AY184219 | 7065  | 7046 | GAYTTRTCIGCIGGIGTCAT       | Pan Polio    |
| 6573A       | 20uM               | 3D          | A            | Sabin 1 AY184219 | 6564  | 6545 | TTICCAAAGCCATYTCAT         | Species C    |
| 6643S       | 40uM               | 3D          | S            | Sabin 1 AY184219 | 6635  | 6653 | TTYTGGAGYAARATACCAG        | Species C    |
| 7024S       | 10uM               | 3D          | S            | Sabin 1 AY184219 | 7013  | 7035 | CTAGCCAATCAGGAAAAGACTA     | Species C    |
| 0023S       | 10uM               | 5 UTR       | S            | Sabin 1 AY184219 | 23    | 39   | CCCACCCAGAGGCCCA           | Species C    |
| 116A        | 40uM               | VP1         | A            | Sabin 1 AY184219 | 2640  | 2621 | GGRTTIGTIGCICIGTYTC        | Pan Polio    |
| 204A        | 80uM               | VP2         | A            | Sabin 1 AY184219 | 1044  | 1025 | ACISARTTIGCIGCYTCYTG       | Pan Polio    |
| 206A        | 40uM               | VP2         | A            | Sabin 1 AY184219 | 1638  | 1619 | GCIATICCCARTTRTRTG         | Pan Polio    |
| 207S        | 40uM               | VP2         | S            | Sabin 1 AY184219 | 1541  | 1560 | ATIAAYCTIMGIACIAAYAA       | Pan Polio    |
| 210S        | 80uM               | VP2         | S            | Sabin 1 AY184219 | 1169  | 1189 | GARTCIMRIGGITGGTGGTGG      | Pan Polio    |
| 208A        | 20uM               | VP3         | A            | Sabin 1 AY184219 | 2154  | 2135 | AGYTTICCGTIGCCATCAT        | Pan Polio    |
| 227S        | 40uM               | VP3         | S            | Sabin 1 AY184219 | 2078  | 2097 | AAITAYTAYACICAYTGGGC       | Pan Polio    |
| 5446S       | 80uM               | VPg         | S            | Sabin 1 AY184219 | 5432  | 5451 | GTICARGGYCCIGGRTTGA        | Species C    |



**Table S5** Reference viruses by sequence ID, strain, serotype and accession number in GenBank (Acc. no.)

| <b>Sequence_ID</b> | <b>Strain</b> | <b>Serotype</b>    | <b>Acc. no.</b> |
|--------------------|---------------|--------------------|-----------------|
| ETH1319533         | ETH1319533    | Human poliovirus 1 | KY941931        |
| PAK1519534         | PAK1519534    | Human poliovirus 1 | KY941934        |
| NIE1219535         | NIE1219535    | Human poliovirus 3 | KY941933        |
| PAK1019536         | PAK1019536    | Human poliovirus 3 | KY941935        |
| IRQ1219537         | IRQ1219537    | Human poliovirus 2 | KY941932        |
